# Supplementary material for: Strategies for photoluminescence enhancement of AgInS2 quantum dots and their application as bioimaging probes
Source: Royal Society of Chemistry journal article supplement (doi:10.1039/c2jm30679d), 2012-01-01
Supplement: c2jm30679d.pdf [file c2jm30679d.pdf]

# Strategies for photoluminescence enhancement of AgInS<sub>2</sub> quantum dots and their application as bioimaging probes

Jia-Yaw Chang,\* Guo-Quan Wang, Chun-Yi Cheng, Wei-Xiang Lin, and Jen-Chieh Hsu

Department of Chemical Engineering, National Taiwan University of Science and Technology, Taipei, Taiwan

E-mail: jychang@mail.ntust.edu.tw

## Supplementary Information

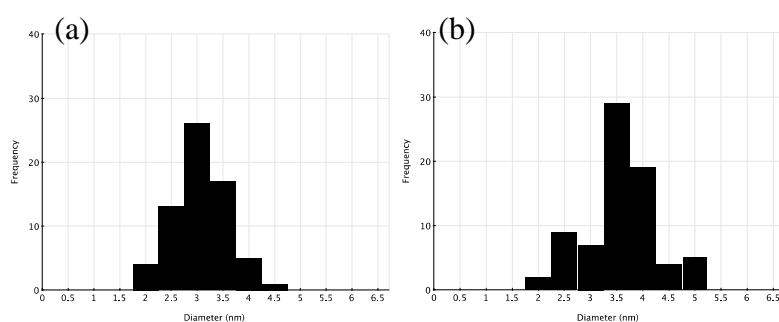

**Fig. S1.** Histogram of size distributions of (a) AgInS<sub>2</sub> and (b) AgInS<sub>2</sub>-ZnS quantum dots measured *via* the TEM images.

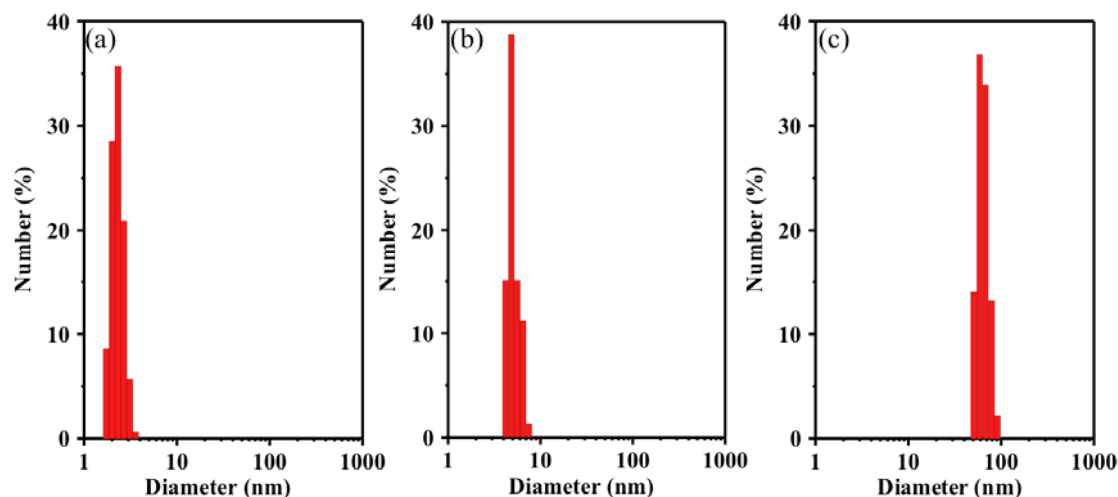

**Fig. S2.** Hydrodynamic diameters of (a) AgInS<sub>2</sub> quantum dots (2.33 nm), (b) AgInS<sub>2</sub>-ZnS quantum dots (5.62 nm), and (c) folic acid-conjugated AgInS<sub>2</sub>-ZnS quantum dots (58.77 nm) obtained from the dynamic light scattering measurement.
